# Supplementary material for: Natural killer cell activation by respiratory syncytial virus-specific antibodies is decreased in infants with severe respiratory infections and correlates with Fc-glycosylation
Source: bioRxiv or medRxiv preprint supplement (doi:10.1101/750141), 2019-11-04

# Supplemental Figure 2

## A

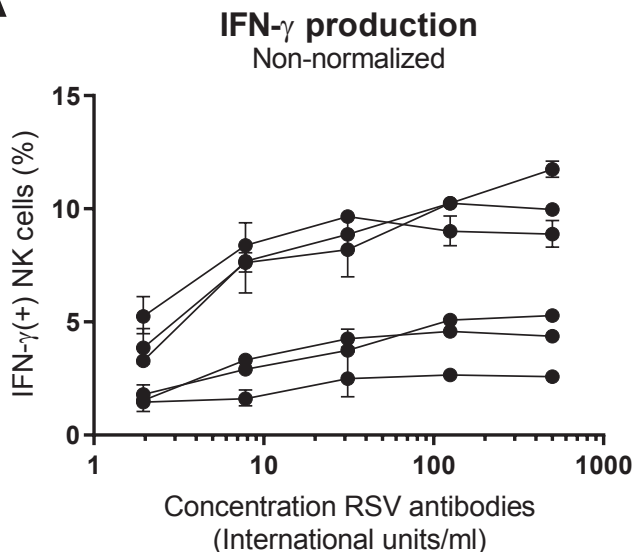

## B

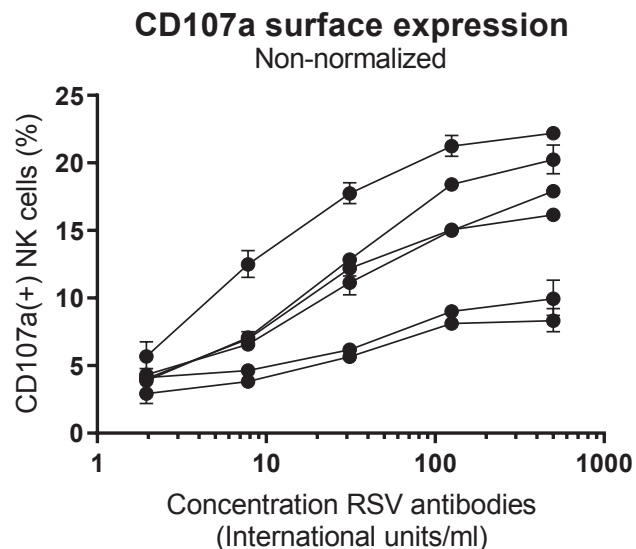

## C

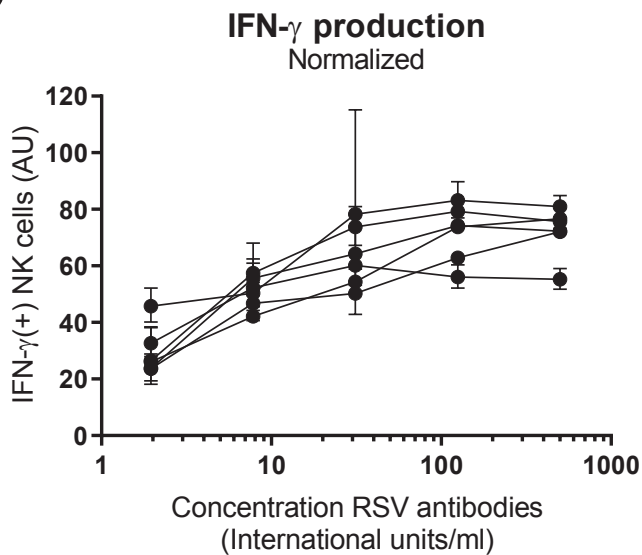

## D

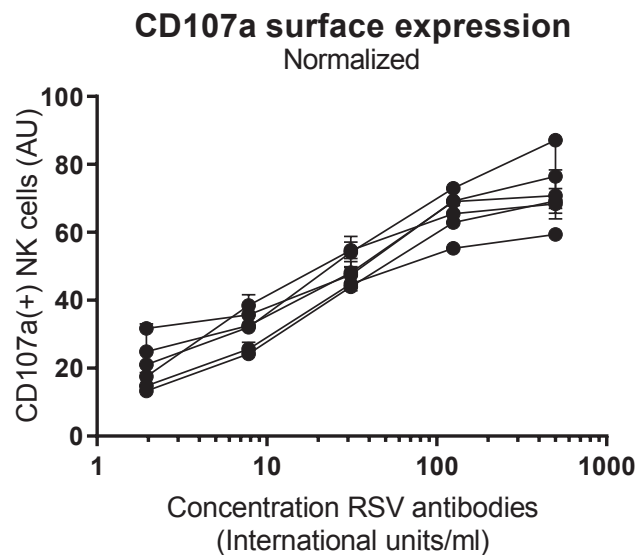

Supplement: Supplementary file [file media-2.pdf]
